# Supplementary material
Source: PubMed Central journal article supplement (PMC3265344)
Supplement: CJN.07350711_CJN07350711SupplementaryData.pdf [file CJN.07350711_CJN07350711SupplementaryData.pdf]

## **Appendix Methods. More sensitivity analyses**

We performed a number of further sensitivity analyses:

- 1) We added a second comparator - adding two new stage 3b-4 CKD clinics. This second clinic was determined in a previous study (12) to be optimally located in Vermilion, Alberta. We also considered three independent alternative sites for the new clinic: Vermilion, Endiang and St. Lina. Again, from a previous study (12), we selected these to be most optimal after Grand Prairie.
- 2) We considered a scenario where we did not reallocate any staffing costs for patients in whom care was shifted from a previous to the new clinic; we assigned all staffing costs as new costs. Since some of the patients served by the new clinic had already been seen by a nephrologist, we also considered the scenario where benefit was attributed only to new patients.
- 3) We doubled and halved the number of patients expected to use the new clinic.
- 4) We explored the effects of using the remote category's comorbidity profile in place of the profile generated using the overall AKDN cohort (10). We substituted the means from the remote distance category (>120 min) for the means using all distance categories for the values of the covariates in the adjusted estimates of effectiveness and costs. Percentage Aboriginal, DM cause of renal disease, heart failure, and COPD were increased in the remote profile and mean age, median eGFR, percent females, subsidy, dementia were decreased in the remote profile.
- 5) One-way sensitivity analyses were performed on all cost and effectiveness parameters using the lower and upper 95% confidence limits where available, or halving and

doubling the estimate where confidence limits were not available. For the stage 3b-4 CKD states, we changed all four estimates to be their respective upper or lower values.

### **Appendix Results. More sensitivity analyses**

- 1) Alternative locations as well as adding a second clinic had similar ICURs (range \$4877-5192/QALY; Appendix Table 3).
- 2) If all expenditures due to staffing the new clinic were considered new costs (meaning that no staff were reallocated), then the ICUR increased to \$6624/QALY (Appendix Table 4). If all benefit was attributed only to new patients then the ICUR increased to \$7942/QALY.
- 3) When we doubled or halved the number of patients attending the proposed clinic, the ICURs remained comparable (\$5854/QALY and \$4477/QALY, respectively).
- 4) When we used the comorbidity profile from the remote category rather than the overall profile for Alberta stage 3b-4 CKD patients, the ICUR decreased minimally (\$3626/QALY vs \$4774/QALY).
- 5) If the start-up and ongoing costs of the proposed clinic were doubled in one-way sensitivity analyses, then the ICURs would not exceed \$7,000/QALY. Under no plausible scenarios were the ICURs cost-saving (Appendix Tables 5 and 6).

**Appendix Table 1. Comparator items: Resource and costs with alternative locations**

| Item                                  | Unit valuation,* \$ | Quantity      |                              |            |         |          |
|---------------------------------------|---------------------|---------------|------------------------------|------------|---------|----------|
|                                       |                     | Grand Prairie | Grand Prairie and Vermillion | Vermillion | Endiang | St. Lina |
| <b>Patient counts</b>                 |                     |               |                              |            |         |          |
| Patients in a ≤120 min service region |                     | 876           | 1557                         | 681        | 353     | 517      |
| Patients expected to access service   |                     | 321           | 556                          | 304        | 268     | 278      |
| Number of new patients                |                     | 137           | 226                          | 119        | 83      | 92       |
| <b>Start-up clinic</b>                |                     |               |                              |            |         |          |
| Examination table                     | 2200                | 1             | 2                            | 1          | 1       | 1        |
| Thermometer                           | 750                 | 1             | 2                            | 1          | 1       | 1        |
| Glucometer                            | 1500                | 1             | 2                            | 1          | 1       | 1        |
| Blood pressure cuff                   | 250                 | 1             | 2                            | 1          | 1       | 1        |
| Scale                                 | 500                 | 1             | 2                            | 1          | 1       | 1        |
| AED                                   | 2500                | 1             | 2                            | 1          | 1       | 1        |
| Small fridge                          | 200                 | 1             | 2                            | 1          | 1       | 1        |
| Computer                              | 1500                | 4             | 8                            | 4          | 4       | 4        |
| Office desk                           | 600                 | 2             | 4                            | 2          | 2       | 2        |
| Chair                                 | 500                 | 4             | 8                            | 4          | 4       | 4        |
| Phone handset                         | 172                 | 4             | 8                            | 4          | 4       | 4        |
| Reception desk                        | 1500                | 1             | 2                            | 1          | 1       | 1        |
| Filing cabinet                        | 1500                | 2             | 4                            | 2          | 2       | 2        |
| Printer                               | 181                 | 1             | 2                            | 1          | 1       | 1        |
| Fax                                   | 250                 | 1             | 2                            | 1          | 1       | 1        |
| Garbage can                           | 8.45                | 4             | 8                            | 4          | 4       | 4        |
| Recycling bin                         | 7.99                | 4             | 8                            | 4          | 4       | 4        |
| Total, \$                             |                     | 22,719        | 45,439                       | 22,719     | 22,719  | 22,719   |
| Total per patient, <sup>y</sup> \$    |                     | 70.78         | 81.72                        | 74.73      | 84.77   | 81.72    |
| <b>Ongoing 6-month clinic care</b>    |                     |               |                              |            |         |          |

|                                                         |          |         |         |         |         |         |
|---------------------------------------------------------|----------|---------|---------|---------|---------|---------|
| 1200 ft <sup>2</sup> space rental                       | 1300/mo  | 0.5     | 1       | 0.5     | 0.5     | 0.5     |
| Cleaning service                                        | 845/mo   | 0.5     | 1       | 0.5     | 0.5     | 0.5     |
| Phone service                                           | 65/mo    | 4       | 8       | 4       | 4       | 4       |
| Internet service                                        | 60/mo    | 1       | 1       | 1       | 1       | 1       |
| Wage plus benefits:<br>added staffing:†                 |          |         |         |         |         |         |
| Administrative assistant                                | 51,900/y | 0.3 FTE | 0.5     | 0.3     | 0.3     | 0.3     |
| Nurse                                                   | 85,912/y | 0.3     | 0.5     | 0.3     | 0.3     | 0.3     |
| Dietician                                               | 97,349/y | 0.1     | 0.15    | 0.1     | 0.1     | 0.1     |
| Social worker                                           | 91,352/y | 0.1     | 0.15    | 0.1     | 0.1     | 0.1     |
| Non-resident nephrologist:                              |          |         |         |         |         |         |
| Air travel trips                                        | 463/trip | 6 trips | 6 trips | 0 trips | 0 trips | 0 trips |
| Ground travel trips                                     | 230/trip | 0 trips | 6 trips | 6 trips | 6 trips | 6 trips |
| Hotel                                                   | 150/d    | 24 d    | 48 d    | 24 d    | 24 d    | 24 d    |
| Food                                                    | 50/d     | 30 d    | 60 d    | 30 d    | 30 d    | 30 d    |
| Small medical and office<br>Supplies                    | 1000/6mo | 1       | 1.5     | 1       | 1       | 1       |
| Total, \$                                               |          | 49,850  | 86,894  | 49,152  | 49,152  | 49,152  |
| Total per patient, \$                                   |          | 155.30  | 156.85  | 162.22  | 183.40  | 177.44  |
| Including physician claims and medications <sup>€</sup> |          |         |         |         |         |         |
| Total, \$                                               |          | 121,324 | 215,495 | 121,545 | 118,218 | 119,593 |
| Total per patient, \$                                   |          | 377.96  | 387.58  | 399.82  | 441.11  | 430.19  |

\*valuation and numbers of resources were estimated by experts.

†this would be staffing hours added for the new patients. Note, physician claim costs are included in Table 3.

‡calculated by dividing the total by the number of patients expected to access service.

€estimated using models adjusting for distance categories; see Table 2.

AED automated external defibrillator

**Appendix Table 2. Distribution of patients with alternative locations**

| Model input                                                                          | 6-month estimate and 95% CI |             |              |          | Reference                |
|--------------------------------------------------------------------------------------|-----------------------------|-------------|--------------|----------|--------------------------|
|                                                                                      | ≤30 min                     | 30.1-60 min | 60.1-120 min | >120 min |                          |
| Distribution of patients (across distance categories) with current care <sup>‡</sup> | 0                           | 0           | 0            | 1        | Ayyalasomayajula 2011(8) |
| Distribution of patients with Grand Prairie clinic                                   | 0.403                       | 0.115       | 0.482        | 0        | Ayyalasomayajula 2011    |
| Distribution of patients with Grand Prairie and Vermilion clinics                    | 0.321                       | 0.301       | 0.378        | 0        | Ayyalasomayajula 2011    |
| Distribution of patients with Vermilion clinic                                       | 0.216                       | 0.539       | 0.245        | 0        | Ayyalasomayajula 2011    |
| Distribution of patients with Endiang clinic                                         | 0                           | 0.326       | 0.674        | 0        | Ayyalasomayajula 2011    |
| Distribution of patients with St. Lina clinic                                        | 0.039                       | 0.435       | 0.526        | 0        | Ayyalasomayajula 2011    |

<sup>‡</sup>Distribution (or proportions) of patients across distance categories for current care are based on patients expected to access the service. Patients expected to access the service were calculated from those who be switched from the >120 min distance category to a category within 120 min multiplied by the expected nephrology referral.

**Appendix Table 3. Results: Alternative locations**

| <b>Analysis</b>        | <b>Comparator</b>                   | <b>Cost, \$</b> | <b>Cost Δ, \$</b> | <b>Utility</b> | <b>Utility Δ</b> | <b>ICUR, \$/QALY</b> |
|------------------------|-------------------------------------|-----------------|-------------------|----------------|------------------|----------------------|
| Primary                | Reference case                      | 29525.25        | -                 | 8.995          | -                | -                    |
|                        | Adding one clinic:<br>Grand Prairie | 33328.51        | 3803.26           | 9.792          | 0.797            | 4774.01              |
| Adding a second clinic | Adding a second clinic: Vermilion   | 33541.84        | 4016.59           | 9.818          | 0.823            | 4880.43              |
| Alternative sites      | Adding one clinic: Vermilion        | 33410.94        | 3885.70           | 9.792          | 0.797            | 4877.49              |
|                        | Adding one clinic: Endiang          | 33661.19        | 4135.95           | 9.792          | 0.797            | 5191.61              |
|                        | Adding one clinic: St. Lina         | 33590.55        | 4065.30           | 9.792          | 0.797            | 5102.93              |

†75.2% of the costs were due to physician claims, 13.1% due to anti-hypertensive medications (specifically ACEi and ARB), 11.7% due to lipid-lowering medications (statins, fibrates, nicotinic acid derivatives, bile acid sequestrants, ezetimibe, probucol)

ICUR incremental cost-utility ratio, QALY quality-adjusted life year, CL confidence limit

**Appendix Table 4. Results: Scenario sensitivity analyses**

| Analysis                                                        | Comparator/<br>change               | Total cost, \$ | Incremental<br>cost, \$ | Total<br>QALYs | Incremental<br>QALYs | ICUR,<br>\$/QALY |
|-----------------------------------------------------------------|-------------------------------------|----------------|-------------------------|----------------|----------------------|------------------|
| Primary                                                         | Reference case                      | 29525.25       | -                       | 8.995          | -                    | -                |
|                                                                 | Adding one clinic:<br>Grand Prairie | 33328.51       | 3803.26                 | 9.792          | 0.797                | 4774.01          |
| No staffing cost<br>reallocation (all<br>new staffing<br>costs) | Ongoing costs:<br>285.25            | 34802.32       | 5277.08                 | 9.792          | 0.797                | 6624.00          |
| Nephrology<br>referral                                          | Doubled: 642                        | 34189.28       | 4664.03                 | 9.792          | 0.797                | 5854.48          |
|                                                                 | Halved: 160                         | 33092.27       | 3567.02                 | 9.792          | 0.797                | 4477.47          |
| Benefit only to<br>new patients                                 | New patients: 135                   | 35853.62       | 6327.38                 | 9.792          | 0.797                | 7942.38          |
| Startup clinic<br>costs                                         | Doubled: 141.56                     | 33399.29       | 3874.04                 | 9.792          | 0.797                | 4862.86          |
|                                                                 | Halved: 35.39                       | 33293.12       | 3767.87                 | 9.792          | 0.797                | 4729.59          |
| Ongoing clinic<br>costs                                         | Doubled: 310.60                     | 35089.83       | 5564.58                 | 9.792          | 0.797                | 6984.89          |
|                                                                 | Halved: 77.65                       | 32447.85       | 2922.61                 | 9.792          | 0.797                | 3668.57          |
| Comorbidity<br>profile: Remote<br>category                      | Revised reference<br>case           | 33221.75       | -                       | 8.662          | -                    | -                |
|                                                                 | Adding one clinic                   | 36102.50       | 2880.75                 | 9.456          | 0.795                | 3625.53          |



**Appendix Table 5. Results: “One-way” sensitivity analyses – Stage 3-4 CKD health states**

| <b>Analysis</b>                         | <b>Comparator</b>                   | <b>Cost, \$</b> | <b>Cost Δ, \$</b> | <b>Utility</b>   | <b>Utility Δ</b> | <b>ICUR, \$/QALY</b>  |
|-----------------------------------------|-------------------------------------|-----------------|-------------------|------------------|------------------|-----------------------|
| Primary                                 | Reference case                      | 29525.25        | -                 | 8.995            | -                | -                     |
|                                         | Adding one clinic:<br>Grand Prairie | 33328.51        | 3803.26           | 9.792            | 0.797            | 4774.01               |
| Transition probability to dialysis care | Revised reference case              | 30399.58        | -                 | 8.979            | -                | -                     |
|                                         | Upper 95% CLs                       | 34334.93        | 3935.36           | 9.769            | 0.790            | 4979.63               |
|                                         | Revised reference case              | 29086.34        | -                 | 9.004            | -                | -                     |
|                                         | Lower 95% CLs                       | 32639.93        | 3553.59           | 9.808            | 0.804            | 4419.80               |
| Transition probability to mortality     | Revised reference case              | 28545.19        | -                 | 8.692            | -                | -                     |
|                                         | Upper 95% CLs                       | 32467.39        | 3922.20           | 9.533            | 0.841            | 4664.33               |
|                                         | Revised reference case              | 30220.31        | -                 | 9.210            | -                | -                     |
|                                         | Lower 95% CLs                       | 34189.08        | 3968.78           | 10.051           | 0.841            | 4720.61               |
| Probability of hospitalization          | Revised reference case              | 30431.42        | -                 | 8.995            | -                | -                     |
|                                         | Upper 95% CLs                       | 34023.61        | 3592.19           | 9.792            | 0.797            | 4509.09               |
|                                         | Revised reference case              | 28701.45        | -                 | 8.995            | -                | -                     |
|                                         | Lower 95% CLs                       | 32663.22        | 3961.77           | 9.792            | 0.797            | 4972.98               |
| Life-years                              | Revised reference case              | 29525.25        | -                 | 5.235 life-years | -                | -                     |
|                                         | Adding one clinic                   | 33328.51        | 3803.26           | 5.701 life-years | 0.466            | 8161.69/<br>life-year |
| Utility score                           | Revised reference case              | 29525.25        | -                 | 9.308            | -                | -                     |
|                                         | Upper 95% CLs                       | 33328.51        | 3803.26           | 10.132           | 0.824            | 4615.56               |
|                                         | Revised reference case              | 29525.25        | -                 | 8.578            | -                | -                     |
|                                         | Lower 95% CLs                       | 33328.51        | 3803.26           | 9.338            | 0.760            | 5003.03               |

| Analysis                             | Comparator             | Cost, \$ | Cost Δ, \$ | Utility | Utility Δ | ICUR, \$/QALY |
|--------------------------------------|------------------------|----------|------------|---------|-----------|---------------|
| Physician claim and medication cost† | Revised reference case | 29677.41 | -          | 8.995   | -         | -             |
|                                      | Upper 95% CLs          | 33459.92 | 3782.51    | 9.792   | 0.797     | 4747.96       |
|                                      | Revised reference case | 29379.43 | -          | 8.995   | -         | -             |
|                                      | Lower 95% CLs          | 33201.80 | 3822.37    | 9.792   | 0.797     | 4797.99       |
| Hospitalization cost                 | Revised reference case | 31292.86 | -          | 8.995   | -         | -             |
|                                      | Upper 95% CLs          | 34669.92 | 3377.06    | 9.792   | 0.797     | 4239.02       |
|                                      | Revised reference case | 27753.45 | -          | 8.995   | -         | -             |
|                                      | Lower 95% CLs          | 31986.72 | 4233.28    | 9.792   | 0.797     | 5313.78       |

†75.2% of the costs were due to physician claims, 13.1% due to anti-hypertensive medications (specifically ACEi and ARB), 11.7% due to lipid-lowering medications (statins, fibrates, nicotinic acid derivatives, bile acid sequestrants, ezetimibe, probucol)

ICUR incremental cost-utility ratio, QALY quality-adjusted life year, CL confidence limit

**Appendix Table 6. Results: One-way sensitivity analyses – Other health states**

| Analysis                                                     | Comparator             | Cost, \$ | Cost Δ, \$ | Utility | Utility Δ | ICUR, \$/QALY |
|--------------------------------------------------------------|------------------------|----------|------------|---------|-----------|---------------|
| Transition probability to transplantation care from dialysis | Revised reference case | 29452.09 | -          | 8.997   | -         | -             |
|                                                              | Doubled: 0.024         | 33220.50 | 3768.41    | 9.794   | 0.798     | 4725.21       |
|                                                              | Revised reference case | 29564.15 | -          | 8.994   | -         | -             |
|                                                              | Halved: 0.006          | 33385.92 | 3821.77    | 9.790   | 0.796     | 4799.97       |
| Transition probability to mortality from dialysis            | Revised reference case | 29469.72 | -          | 8.994   | -         | -             |
|                                                              | Upper 95% CLs: 0.105   | 33245.20 | 3775.48    | 9.791   | 0.796     | 4741.58       |
|                                                              | Revised reference case | 29584.89 | -          | 8.996   | -         | -             |
|                                                              | Lower 95% CLs: 0.095   | 33418.02 | 3833.13    | 9.793   | 0.797     | 4808.85       |
| Transition probability to mortality from transplantation     | Revised reference case | 29527.35 | -          | 8.994   | -         | -             |
|                                                              | Doubled: 0.048         | 33324.57 | 3802.00    | 9.791   | 0.796     | 4774.94       |
|                                                              | Revised reference case | 29527.35 | -          | 8.996   | -         | -             |
|                                                              | Halved: 0.012          | 33331.60 | 3804.25    | 9.793   | 0.797     | 4773.05       |
| Transition probability to dialysis care (graft failure)      | Revised reference case | 29538.97 | -          | 8.995   | -         | -             |
|                                                              | Upper 95% CLs: 0.05    | 33348.65 | 3809.68    | 9.791   | 0.796     | 4783.06       |
|                                                              | Revised reference case | 29513.13 | -          | 8.996   | -         | -             |
|                                                              | Lower 95% CLs: 0.0001  | 33310.75 | 3797.62    | 9.792   | 0.797     | 4766.06       |
| Utility score for dialysis                                   | Revised reference case | 29525.25 | -          | 8.997   | -         | -             |
|                                                              | Upper 95% CLs: 0.652   | 33328.51 | 3803.26    | 9.794   | 0.797     | 4769.28       |
|                                                              | Revised reference case | 29525.25 | -          | 8.994   | -         | -             |

| Analysis                          | Comparator                                                                                                | Cost, \$ | Cost Δ, \$ | Utility | Utility Δ | ICUR, \$/QALY |
|-----------------------------------|-----------------------------------------------------------------------------------------------------------|----------|------------|---------|-----------|---------------|
|                                   | Lower 95% CLs:<br>0.566                                                                                   | 33328.51 | 3803.26    | 9.789   | 0.796     | 4778.75       |
| Utility score for transplantation | Revised reference case                                                                                    | 29525.25 | -          | 8.996   | -         | -             |
|                                   | Ceilinged: 0.99                                                                                           | 33328.51 | 3803.26    | 9.793   | 0.797     | 4771.12       |
|                                   | Revised reference case                                                                                    | 29525.25 | -          | 8.994   | -         | -             |
|                                   | Halved: 0.37                                                                                              | 33328.51 | 3803.26    | 9.790   | 0.796     | 4778.30       |
| Cost for dialysis                 | Revised reference case                                                                                    | 29642.30 | -          | 8.995   | -         | -             |
|                                   | Upper 95% CLs:<br>49133                                                                                   | 33503.34 | 3861.05    | 9.792   | 0.797     | 4846.55       |
|                                   | Revised reference case                                                                                    | 29404.04 | -          | 8.995   | -         | -             |
|                                   | Lower 95% CLs:<br>42731                                                                                   | 33147.47 | 3743.43    | 9.792   | 0.797     | 4698.91       |
| Cost for transplantation          | Revised reference case                                                                                    | 29525.25 | -          | 8.995   | -         | -             |
|                                   | Upper 95% CLs:<br>\$30963<br>pretransplant<br>\$30419 during<br>first year<br>\$12498 after first<br>year | 33328.51 | 3803.26    | 9.792   | 0.797     | 4774.01       |
|                                   | Revised reference case                                                                                    | 29525.25 | -          | 8.995   | -         | -             |
|                                   | Lower 95% CLs:<br>\$23953<br>pretransplant<br>\$25146 during<br>first year<br>\$10336 after first<br>year | 33328.51 | 3803.26    | 9.792   | 0.797     | 4774.01       |

ICUR incremental cost-utility ratio, QALY quality-adjusted life year, CL confidence limit

**Appendix Figure. Probability sensitivity analysis: One added clinic vs none**

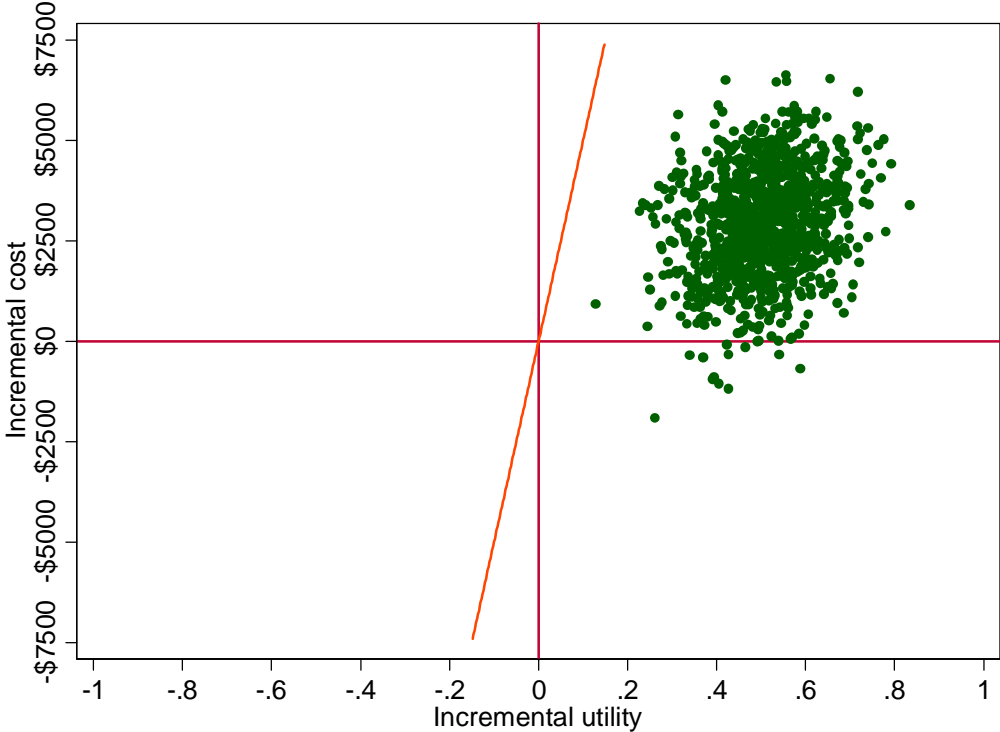

**Willingness-to-pay was set equal to \$50,000.**
